# Supplementary material for: Predicting Dropout from Children’s Mental Health Services: Using a Need-Based Definition of Dropout
Source: Springer Nature journal article supplement (doi:10.1007/s10578-019-00906-4), 2019-07-09

Supplementary Tables and Figures

Table 1

| CANS Subscale | CANS Item | Item Description | Rating | Rating Description |
| --- | --- | --- | --- | --- |
| Problem Presentation |  |  |  |  |
|  | Attention Deficit/Impulse Control | Symptoms of Attention Deficit and Hyperactivity Disorder and Impulse Control Disorder would  be rated here. Inattention/distractibility not related to opposition would also be rated here. | 0 | This rating is used to indicate a child with no evidence of attention/hyperactivity  problems. |
|  |  |  | 1 | This rating is used to indicate a child with evidence of mild problems with  attention/hyperactivity or impulse control problems. Child may have some difficulties staying  on task for an age appropriate time period. |
|  |  |  | 2 | This rating is used to indicate a child with moderate symptoms of  attention/hyperactivity or impulse control problems. A child who meets DSM-IV diagnostic  criteria for ADHD would be rated here. |
|  |  |  | 3 | This rating is used to indicate a child with severe impairment of attention or dangerous  impulse control problems. Frequent impulsive behavior is observed or noted that carries  considerable safety risk (e.g. running into the street, dangerous driving or bike riding). A child  with profound symptoms of ADHD would be rated here. |
| Risk Behaviour |  |  |  |  |
|  | Danger to Others | This rating includes actual and threatened violence. Imagined violence, when extreme, may be  rated here. A rating of 2 or 3 would indicate the need for a safety plan. | 0 | Child has no evidence or history of aggressive behaviors or significant verbal aggression  towards others (including people and animals). |
|  |  |  | 1 | History of aggressive behavior or verbal aggression towards others but no aggression during  the past 30 days. History of fire setting (not in past year) would be rated here. |
|  |  |  | 2 | Occasional or moderate level of aggression towards others including aggression during the  past 30 days or more recent verbal aggression. |
|  |  |  | 3 | Frequent or dangerous (significant harm) level of aggression to others. Any fire setting  within the past year would be rated here. Child or youth is an immediate risk to others. |

Figure 1


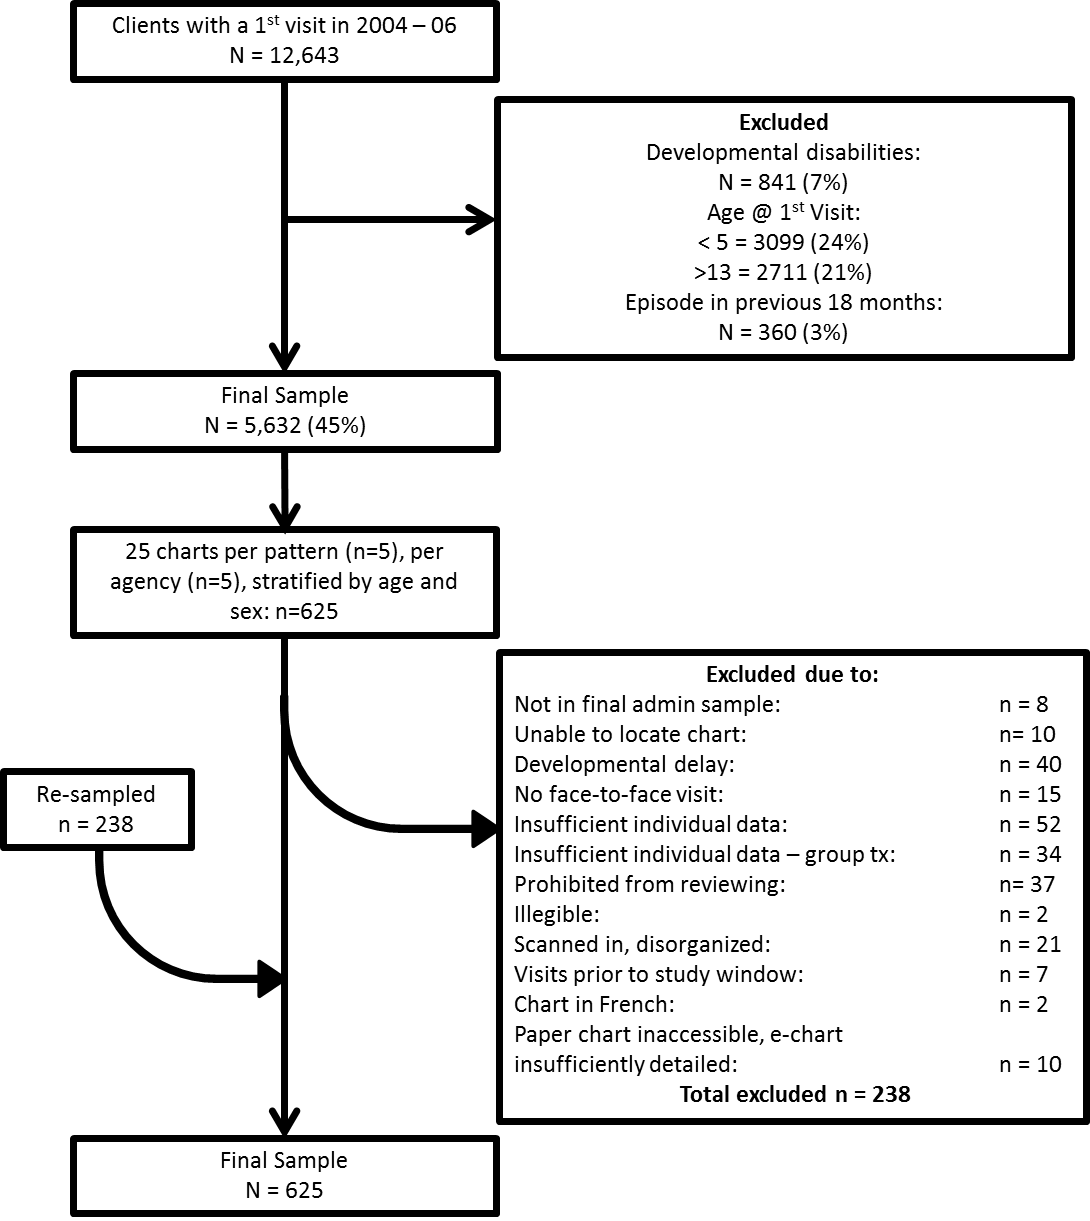

Supplement: MOESM1 [file 16914856]
